# Supplementary material for: Defects in the GINS complex increase the instability of repetitive sequences via a recombination-dependent mechanism
Source: PubMed Central journal article supplement (PMC6922473; doi:10.1371/journal.pgen.1008494), 2019-12-09
Supplement: pgen.1008494.s002.pdf [file pgen.1008494.s002.pdf]

**S1 Table. *p*-values associated with data presented in Figures 1, 2, 3, 4, 5, 7, 8.**

|                      |            |               |               |                      |          |               |               |
|----------------------|------------|---------------|---------------|----------------------|----------|---------------|---------------|
| <b>Fig 1</b>         |            | <b>Fig 2</b>  |               | <b>Fig 5E-H</b>      |          |               |               |
| <b>RS</b>            | WT         | <b>pKK2</b>   | WT            | <b>pKK2</b>          | WT       | <b>psf1-1</b> | <b>rad51Δ</b> |
| <i>psf1-1</i>        | 0,00000003 | <i>psf1-1</i> | <0,001        | <i>psf1-1 rad51Δ</i> | 0,000108 | 0,000015      | 0,005447      |
|                      |            |               |               | <i>rad51Δ</i>        | 0,000108 | 0,001049      |               |
|                      |            |               |               | <i>psf1-1</i>        | 0,000108 |               |               |
| <b>GAA</b>           | WT         | <b>pMD28</b>  | WT            | <b>p99GT</b>         | WT       | <b>psf1-1</b> | <b>rad51Δ</b> |
| <i>psf1-1</i>        | 0,00021499 | <i>psf1-1</i> | <0,001        | <i>psf1-1 rad51Δ</i> | 0,222248 | 0,000003      | 0,000003      |
|                      |            |               |               | <i>rad51Δ</i>        | 0,000030 | 0,000001      |               |
|                      |            |               |               | <i>psf1-1</i>        | 0,000103 |               |               |
| <b>TTC</b>           | WT         | <b>p99GT</b>  | WT            | <b>pMD41</b>         | WT       | <b>psf1-1</b> | <b>rad51Δ</b> |
| <i>psf1-1</i>        | 0,00015708 | <i>psf1-1</i> | <0,001        | <i>psf1-1 rad51Δ</i> | 0,027487 | 0,000001      | 0,113437      |
|                      |            |               |               | <i>rad51Δ</i>        | 0,002694 | 0,000002      |               |
|                      |            |               |               | <i>psf1-1</i>        | 0,000089 |               |               |
| <b>CTG</b>           | WT         | <b>pMD41</b>  | WT            | <b>pEAS20</b>        | WT       | <b>psf1-1</b> | <b>rad51Δ</b> |
| <i>psf1-1</i>        | 0,00000035 | <i>psf1-1</i> | <0,001        | <i>psf1-1 rad51Δ</i> | 0,109746 | 0,000148      | 0,001566      |
|                      |            |               |               | <i>rad51Δ</i>        | 0,043298 | 0,000002      |               |
|                      |            |               |               | <i>psf1-1</i>        | 0,000187 |               |               |
|                      |            | <b>pEAS20</b> | WT            |                      |          |               |               |
|                      |            | <i>psf1-1</i> | <0,001        |                      |          |               |               |
| <b>Fig 3A-D</b>      |            |               |               | <b>Fig 7A-D</b>      |          |               |               |
| <b>pKK2</b>          | WT         | <b>psf1-1</b> | <b>msh2Δ</b>  | <b>pKK2</b>          | WT       | <b>psf1-1</b> | <b>mms2Δ</b>  |
| <i>psf1-1 msh2Δ</i>  | 0,000019   | 0,000005      | 0,000215      | <i>psf1-1 mms2Δ</i>  | 0,000293 | 0,022354      | 0,000907      |
| <i>msh2Δ</i>         | 0,000489   | 0,000255      |               | <i>mms2Δ</i>         | 0,002622 | 0,559305      |               |
| <i>psf1-1</i>        | 0,000127   |               |               | <i>psf1-1</i>        | 0,000948 |               |               |
| <b>p99GT</b>         | WT         | <b>psf1-1</b> | <b>msh2Δ</b>  | <b>p99GT</b>         | WT       | <b>psf1-1</b> | <b>mms2Δ</b>  |
| <i>psf1-1 msh2Δ</i>  | 0,000057   | 0,000022      | 0,001243      | <i>psf1-1 mms2Δ</i>  | 0,001013 | 0,000044      | 0,002551      |
| <i>msh2Δ</i>         | 0,000019   | 0,000006      |               | <i>mms2Δ</i>         | 0,202023 | 0,000001      |               |
| <i>psf1-1</i>        | 0,000001   |               |               | <i>psf1-1</i>        | 0,000016 |               |               |
| <b>pMD41</b>         | WT         | <b>psf1-1</b> | <b>msh2Δ</b>  | <b>pMD41</b>         | WT       | <b>psf1-1</b> | <b>mms2Δ</b>  |
| <i>psf1-1 msh2Δ</i>  | 0,000001   | 0,003708      | 0,000025      | <i>psf1-1 mms2Δ</i>  | 0,000944 | 0,000065      | 0,000065      |
| <i>msh2Δ</i>         | 0,113847   | 0,000148      |               | <i>mms2Δ</i>         | 0,198450 | 0,000002      |               |
| <i>psf1-1</i>        | 0,000001   |               |               | <i>psf1-1</i>        | 0,000089 |               |               |
| <b>pEAS20</b>        | WT         | <b>psf1-1</b> | <b>msh2Δ</b>  | <b>pEAS20</b>        | WT       | <b>psf1-1</b> | <b>mms2Δ</b>  |
| <i>psf1-1 msh2Δ</i>  | 0,000001   | 0,583301      | 0,000075      | <i>psf1-1 mms2Δ</i>  | 0,004039 | 0,000003      | 0,000004      |
| <i>msh2Δ</i>         | 0,909850   | 0,000145      |               | <i>mms2Δ</i>         | 0,039001 | 0,000000      |               |
| <i>psf1-1</i>        | 0,000002   |               |               | <i>psf1-1</i>        | 0,000261 |               |               |
| <b>Fig 4A-D</b>      |            |               |               | <b>Fig 8A-D</b>      |          |               |               |
| <b>pKK2</b>          | WT         | <b>psf1-1</b> | <b>rev3Δ</b>  | <b>pKK2</b>          | WT       | <b>psf1-1</b> | <b>pol32Δ</b> |
| <i>psf1-1 rev3Δ</i>  | 0,098578   | 0,000202      | 0,006502      | <i>psf1-1 pol32Δ</i> | 0,000011 | 0,040005      | 0,000000      |
| <i>rev3Δ</i>         | 0,017037   | 0,000032      |               | <i>pol32Δ</i>        | 0,668170 | 0,000002      |               |
| <i>psf1-1</i>        | 0,000001   |               |               | <i>psf1-1</i>        | 0,000089 |               |               |
| <b>p99GT</b>         | WT         | <b>psf1-1</b> | <b>rev3Δ</b>  | <b>p99GT</b>         | WT       | <b>psf1-1</b> | <b>pol32Δ</b> |
| <i>psf1-1 rev3Δ</i>  | 0,000049   | 0,481322      | 0,000071      | <i>psf1-1 pol32Δ</i> | 0,000009 | 0,000000      | 0,000085      |
| <i>rev3Δ</i>         | 0,758289   | 0,000108      |               | <i>pol32Δ</i>        | 0,000001 | 0,000001      |               |
| <i>psf1-1</i>        | 0,000076   |               |               | <i>psf1-1</i>        | 0,000001 |               |               |
| <b>pMD41</b>         | WT         | <b>psf1-1</b> | <b>rev3Δ</b>  | <b>pMD41</b>         | WT       | <b>psf1-1</b> | <b>pol32Δ</b> |
| <i>psf1-1 rev3Δ</i>  | 0,000237   | 0,358796      | 0,000015      | <i>psf1-1 pol32Δ</i> | 0,000000 | 0,010812      | 0,000000      |
| <i>rev3Δ</i>         | 0,803034   | 0,000042      |               | <i>pol32Δ</i>        | 0,969936 | 0,000001      |               |
| <i>psf1-1</i>        | 0,001874   |               |               | <i>psf1-1</i>        | 0,000002 |               |               |
| <b>pEAS20</b>        | WT         | <b>psf1-1</b> | <b>rev3Δ</b>  | <b>pEAS20</b>        | WT       | <b>psf1-1</b> | <b>pol32Δ</b> |
| <i>psf1-1 rev3Δ</i>  | 0,000001   | 0,417430      | 0,000002      | <i>psf1-1 pol32Δ</i> | 0,000448 | 0,000001      | 0,000051      |
| <i>rev3Δ</i>         | 0,315475   | 0,000003      |               | <i>pol32Δ</i>        | 0,610385 | 0,000002      |               |
| <i>psf1-1</i>        | 0,000002   |               |               | <i>psf1-1</i>        | 0,000046 |               |               |
| <b>Fig 5A-D</b>      |            |               |               | <b>Fig 8E-H</b>      |          |               |               |
| <b>pKK2</b>          | WT         | <b>psf1-1</b> | <b>rad52</b>  | <b>pKK2</b>          | WT       | <b>psf1-1</b> | <b>pif1Δ</b>  |
| <i>psf1-1 rad52Δ</i> | 0,000089   | 0,000003      | 0,003704      | <i>psf1-1 pif1Δ</i>  | 0,000300 | 0,002698      | 1,000000      |
| <i>rad52Δ</i>        | 0,000089   | 0,000014      |               | <i>pif1Δ</i>         | 0,000383 | 0,001455      |               |
| <i>psf1-1</i>        | 0,000108   |               |               | <i>psf1-1</i>        | 0,000948 |               |               |
| <b>p99GT</b>         | WT         | <b>psf1-1</b> | <b>rad52Δ</b> | <b>p99GT</b>         | WT       | <b>psf1-1</b> | <b>pif1Δ</b>  |
| <i>psf1-1 rad52Δ</i> | 0,333056   | 0,000001      | 0,000055      | <i>psf1-1 pif1Δ</i>  | 0,078984 | 0,000003      | 0,490688      |
| <i>rad52Δ</i>        | 0,000129   | 0,000001      |               | <i>pif1Δ</i>         | 0,053326 | 0,000002      |               |
| <i>psf1-1</i>        | 0,000103   |               |               | <i>psf1-1</i>        | 0,000016 |               |               |
| <b>pMD41</b>         | WT         | <b>psf1-1</b> | <b>rad52Δ</b> | <b>pMD41</b>         | WT       | <b>psf1-1</b> | <b>pif1Δ</b>  |
| <i>psf1-1 rad52Δ</i> | 0,000089   | 0,000001      | 0,521711      | <i>psf1-1 pif1Δ</i>  | 0,001435 | 0,000382      | 0,000450      |
| <i>rad52</i>         | 0,000239   | 0,000001      |               | <i>pif1Δ</i>         | 0,027487 | 0,000002      |               |
| <i>psf1-1</i>        | 0,000089   |               |               | <i>psf1-1</i>        | 0,000089 |               |               |
| <b>pEAS20</b>        | WT         | <b>psf1-1</b> | <b>rad52Δ</b> | <b>pEAS20</b>        | WT       | <b>psf1-1</b> | <b>pif1Δ</b>  |
| <i>psf1-1 rad52Δ</i> | 0,311603   | 0,000013      | 0,003175      | <i>psf1-1 pif1Δ</i>  | 0,000696 | 0,000002      | 0,000504      |
| <i>rad52Δ</i>        | 0,118755   | 0,000012      |               | <i>pif1Δ</i>         | 0,042961 | 0,000001      |               |
| <i>psf1-1</i>        | 0,000129   |               |               | <i>psf1-1</i>        | 0,000261 |               |               |
