# Supplementary material for: Defects in the GINS complex increase the instability of repetitive sequences via a recombination-dependent mechanism
Source: PubMed Central journal article supplement (PMC6922473; doi:10.1371/journal.pgen.1008494), 2019-12-09
Supplement: pgen.1008494.s003.pdf [file pgen.1008494.s003.pdf]

**S2 Table. Statistical analysis of Rfa1 foci in Wild-type and *psf1-1* cells presented in Fig 6E. Contingency table and chi-square test.**

|                      | Foci number |     |     |     |
|----------------------|-------------|-----|-----|-----|
|                      | 0           | 1   | 2   | ≥ 3 |
| WT                   | 735         | 424 | 115 | 21  |
| <i>psf1-1</i>        | 209         | 301 | 166 | 74  |
| Chi-square statistic | 223,4038    |     |     |     |
| <i>p</i> -value      | 3,68891E-48 |     |     |     |
