# Supplementary material for: Defects in the GINS complex increase the instability of repetitive sequences via a recombination-dependent mechanism
Source: PubMed Central journal article supplement (PMC6922473; doi:10.1371/journal.pgen.1008494), 2019-12-09
Supplement: pgen.1008494.s004.pdf [file pgen.1008494.s004.pdf]

**S3 Table. Yeast strains used in this work.**

| Strain               | Genotype                                                                                                                                                 | Source          |
|----------------------|----------------------------------------------------------------------------------------------------------------------------------------------------------|-----------------|
| SC801                | <i>MAT a CAN1 his7-2 leu2Δ::KanMX4 ura3Δ trp1-289 ade2-1 lys2ΔGG2899-2900 (PSF1, LEU2)</i>                                                               | [1]             |
| SC802                | <i>MAT a CAN1 his7-2 leu2Δ::KanMX4 ura3Δ trp1-289 ade2-1 lys2ΔGG2899-2900 (psf1-1, LEU2)</i>                                                             | [1]             |
| SC538                | <i>MAT a CAN1 his7-2 leu2Δ::KanMX4 ura3Δ trp1-289 ade2-1 lys2ΔGG2899-2900 (PSF1, CaURA3)</i>                                                             | [1]             |
| SC539                | <i>MAT a CAN1 his7-2 leu2Δ::KanMX4 ura3Δ trp1-289 ade2-1 lys2ΔGG2899-2900 (psf1-1, CaURA3)</i>                                                           | [1]             |
| Y423                 | SC801 with <i>msh2::NAT1</i>                                                                                                                             | This work       |
| Y424                 | SC802 with <i>msh2::NAT1</i>                                                                                                                             | This work       |
| Y425                 | SC801 with <i>rev3::HPH</i>                                                                                                                              | This work       |
| Y426                 | SC802 with <i>rev3::HPH</i>                                                                                                                              | This work       |
| Y580                 | SC801 with <i>rad51::HPH</i>                                                                                                                             | This work       |
| Y581                 | SC802 with <i>rad51::HPH</i>                                                                                                                             | This work       |
| Y582                 | SC801 with <i>mms2::HPH</i>                                                                                                                              | This work       |
| Y583                 | SC802 with <i>mms2::HPH</i>                                                                                                                              | This work       |
| Y586                 | SC801 with <i>pif1::HPH</i>                                                                                                                              | This work       |
| Y587                 | SC802 with <i>pif1::HPH</i>                                                                                                                              | This work       |
| Y589                 | SC801 with <i>pol32::HPH</i>                                                                                                                             | This work       |
| Y592                 | SC802 with <i>pol32::HPH</i>                                                                                                                             | This work       |
| Y595                 | SC801 with <i>rad52::HPH</i>                                                                                                                             | This work       |
| Y596                 | SC802 with <i>rad52::HPH</i>                                                                                                                             | This work       |
| SC765                | <i>MATa CAN1 his7-2 leu2Δ::hisG ura3Δ trp1-289 ade2-1 lys2ΔGG2899-2900</i>                                                                               | [1]             |
| Y620                 | <i>MATα CAN1 his7-2 leu2Δ::hisG ura3Δ trp1-289 ade2-1 lys2ΔGG2899-2900</i>                                                                               | This work       |
| Y621                 | Y620 with <i>msh2::NAT1</i>                                                                                                                              | This work       |
| Y622                 | Y620 with <i>rev3::HPH</i>                                                                                                                               | This work       |
| Y623                 | Y620 with <i>rad51::HPH</i>                                                                                                                              | This work       |
| Y624                 | Y620 with <i>mms2::HPH</i>                                                                                                                               | This work       |
| Y625                 | Y620 with <i>pif1::HPH</i>                                                                                                                               | This work       |
| Y626                 | Y620 with <i>pol32::HPH</i>                                                                                                                              | This work       |
| Y627                 | Y620 with <i>rad52::HPH</i>                                                                                                                              | This work       |
| Y631                 | <i>MATa/α CAN1 his7-2 leu2Δ::hisG/leu2 Δ::KanMX4 ura3Δ trp1-289 ade2-1 lys2ΔGG2899-2900 msh2::NAT1/MSH2 (psf1-1, LEU2)/PSF1</i> Cross of Y621 and SC802  | This work       |
| Y632                 | <i>MATa/α CAN1 his7-2 leu2Δ::hisG/leu2 Δ::KanMX4 ura3Δ trp1-289 ade2-1 lys2ΔGG2899-2900 rev3::HPH/REV3 (psf1-1, LEU2)/PSF1</i> Cross of Y622 and SC802   | This work       |
| Y633                 | <i>MATa/α CAN1 his7-2 leu2Δ::hisG/leu2 Δ::KanMX4 ura3Δ trp1-289 ade2-1 lys2ΔGG2899-2900 rad51::HPH/RAD51 (psf1-1, LEU2)/PSF1</i> Cross of Y623 and SC802 | This work       |
| Y634                 | <i>MATa/α CAN1 his7-2 leu2Δ::hisG/leu2 Δ::KanMX4 ura3Δ trp1-289 ade2-1 lys2ΔGG2899-2900 mms2::HPH/MMS2 (psf1-1, LEU2)/PSF1</i> Cross of Y624 and SC802   | This work       |
| Y635                 | <i>MATa/α CAN1 his7-2 leu2Δ::hisG/leu2 Δ::KanMX4 ura3Δ trp1-289 ade2-1 lys2ΔGG2899-2900 pif1::HPH/PIF1 (psf1-1, LEU2)/PSF1</i> Cross of Y625 and SC802   | This work       |
| Y636                 | <i>MATa/α CAN1 his7-2 leu2Δ::hisG/leu2 Δ::KanMX4 ura3Δ trp1-289 ade2-1 lys2ΔGG2899-2900 pol32::HPH/POL32 (psf1-1, LEU2)/PSF1</i> Cross of Y626 and SC802 | This work       |
| Y637                 | <i>MATa/α CAN1 his7-2 leu2Δ::hisG/leu2 Δ::KanMX4 ura3Δ trp1-289 ade2-1 lys2ΔGG2899-2900 rad52::HPH/RAD52 (psf1-1, LEU2)/PSF1</i> Cross of Y627 and SC802 | This work       |
| Y433                 | SC801 with (CTG) <sub>x25</sub> from pMA1                                                                                                                | This work       |
| Y434                 | SC802 with (CTG) <sub>x25</sub> from pMA1                                                                                                                | This work       |
| Y610                 | SC801 with (GAA) <sub>x25</sub> from pMA5                                                                                                                | This work       |
| Y611                 | SC802 with (GAA) <sub>x25</sub> from pMA5                                                                                                                | This work       |
| Y612                 | SC801 with (TTC) <sub>x25</sub> from pMA6                                                                                                                | This work       |
| Y613                 | SC802 with (TTC) <sub>x25</sub> from pMA6                                                                                                                | This work       |
| Y614                 | SC801 with random sequence from pMA7                                                                                                                     | This work       |
| Y615                 | SC802 with random sequence from pMA7                                                                                                                     | This work       |
| BY4741 <i>rad51Δ</i> | <i>MAT a his3Δ1 leu2Δ0 met15Δ0 ura3Δ0 rad51::KanMX4</i>                                                                                                  | Open Biosystems |
| W3775-12C            | <i>MATa ADE2 bar1::LEU2 trp1-1 LYS2 RFA1-8ala-YFP RAD5</i>                                                                                               | [2]             |
| Y599                 | SC538 with <i>RFA1-YFP</i>                                                                                                                               | This work       |
| Y600                 | SC539 with <i>RFA1-YFP</i>                                                                                                                               | This work       |

1. Grabowska E, Wronska U, Denkiewicz M, Jaszczur M, Respondek A, Alabrudzinska M, et al. Proper functioning of the GINS complex is important for the fidelity of DNA replication in yeast. *Mol Microbiol.* 2014;92: 659–680. doi:10.1111/mmi.12580
2. Lisby M, Barlow JH, Burgess RC, Rothstein R, Street W, York N. Choreography of the DNA Damage Response : Spatiotemporal Relationships among Checkpoint and Repair Proteins. 2004;118: 699–713. doi:<https://doi.org/10.1016/j.cell.2004.08.015>
