# Supplementary material for: Defects in the GINS complex increase the instability of repetitive sequences via a recombination-dependent mechanism
Source: PubMed Central journal article supplement (PMC6922473; doi:10.1371/journal.pgen.1008494), 2019-12-09
Supplement: pgen.1008494.s005.pdf [file pgen.1008494.s005.pdf]

**S4 Table. Primers used in this work.**

| Primer name                                                                                                           | Sequence 5'→3'                                                     |
|-----------------------------------------------------------------------------------------------------------------------|--------------------------------------------------------------------|
| <b>Primers used for gene disruption</b>                                                                               |                                                                    |
| REV3_UPTEF                                                                                                            | CAATACAAAACACTACAAGTTGTGGCGAAAATAAAATGTTTGAAAATGAGATCTGTTTAGCTTGCC |
| REV3_DNTEF                                                                                                            | ATAACTACTCATCATTTTTGCGAGACATATCTGTGTCTAGATTATTTCGAGCTCGTTTTCGACAC  |
| RAD52_UPTEF                                                                                                           | ACGAAAAATATAGCGGCGGGCGGGTTACGCGACCGGTATCGAATGGAGATCTGTTTAGCTTGCC   |
| RAD52_DNTEF                                                                                                           | ATAATGATGCAAAATTTTTATTTGTTTCGGCCAGGAAGCGTTTCAATTCGAGCTCGTTTTCGACAC |
| MSH2_UPTEF                                                                                                            | CTTTATCTGCTGACCTAACATCAAAATCCTCAGATTAAGATGAGATCTGTTTAGCTTGCC       |
| MSH2_DNTEF                                                                                                            | ATTATCTATCGATTCTCACTTAAGATGTCGTTGTAATATTAATTATTCGAGCTCGTTTTCGACAC  |
| RAD51_UPTEF                                                                                                           | ACGTAGTTATTTGTTAAAGGCCTACTAATTTGTTATCGTCATATGGAGATCTGTTTAGCTTGCC   |
| RAD51_DNTEF                                                                                                           | AAGTAAACCTGTGTAATAAAATAGAGACAAGAGACCAAATACCTAATTCGAGCTCGTTTTCGACAC |
| MMS2_UPTEF                                                                                                            | ATTCTGTATATGCAACGTAGAAGAAAGCAGCGTTTACACAAAAATGAGATCTGTTTAGCTTGCC   |
| MMS2_DNTEF                                                                                                            | TGGCTTGGAATGCTGCAAATACTGTTTAGGAAAAAGTAGATAACTATTCGAGCTCGTTTTCGACAC |
| PIF1_UPTEF                                                                                                            | TTATCCATTGAGCGATTAGCTTACTTGTATCAATCAATTTTACATGAGATCTGTTTAGCTTGCC   |
| PIF1_DNTEF                                                                                                            | ATAGCAGTTTGTATTCTATATAACTATGTGTATTAATATGTACTTATTCGAGCTCGTTTTCGACAC |
| POL32_UPTEF                                                                                                           | ATAATATTTACATTAACAAACAGAAATAGGCTTTAGTTAACTCAATCGGTAATTA            |
| POL32_DNTEF                                                                                                           | CATTTGTATTATACATTACATCACAATTAGTAATGGAAAGTGTGGAAAAAAGAAG            |
| <b>Primers used for deletion confirmation</b>                                                                         |                                                                    |
| HPH UO                                                                                                                | ACAGACGTCGCGGTGAGTTCAG                                             |
| HPH DO                                                                                                                | TCGCCGATAGTGAAACCGACG                                              |
| NAT1 UO                                                                                                               | ACCGGTAAGCCGTGTCGCAAG                                              |
| NAT1 DO                                                                                                               | GCTTCGTGGTCGTCTCGTACTC                                             |
| REV3 A                                                                                                                | AATTCTGCCAATCTATTTGATCTTG                                          |
| REV3 B                                                                                                                | TCTGATTTAGAGGATGATCTAACCG                                          |
| REV3 C                                                                                                                | TAAATGAAGACCATAGAGCAGAACC                                          |
| REV3 D                                                                                                                | CACCAGATAGAGTTTTGAACGAAAT                                          |
| RAD52 A                                                                                                               | GATTCAACAACCTCCCTTGGCGTC                                           |
| RAD52 B                                                                                                               | CAACCTTCGATGTATGCAATCCTG                                           |
| RAD52 C                                                                                                               | CGCGTGAAACACACCAA                                                  |
| RAD52 D                                                                                                               | TACGACACATGGAGGAAAGAAAAAC                                          |
| RAD51 A                                                                                                               | CCAATCTAGTTTAGCTATCCTGCAA                                          |
| RAD51 B                                                                                                               | AAAGTGTGACATAGCTGGGACTTAC                                          |
| RAD51 C                                                                                                               | GTAAGTCCCAGCTATGTCACACTTT                                          |
| RAD51 D                                                                                                               | AATTTTTCTCTTCACTCCCTAAAA                                           |
| MSH2 A                                                                                                                | CGTATAAACAAAGCCAAAGACAAGT                                          |
| MSH2 B                                                                                                                | CCCAATTGAATCAAGAACTCTCTA                                           |
| MSH2 C                                                                                                                | TGAATTGACAGAATTGTCTGAAAA                                           |
| MSH2 D                                                                                                                | ACATCTCTTGTATCCCATCCATA                                            |
| PIF1 A                                                                                                                | AAAGGCGCGTCTTAATTTTCTTCACT                                         |
| PIF1 B                                                                                                                | GTGCGATACGTTTTTGTAGTAAAAGAAA                                       |
| PIF1 C                                                                                                                | ATCAAGTTCATTGTTTCCGAC                                              |
| PIF1 D                                                                                                                | CTTTTTCTATCGAAGGAGGTTACC                                           |
| MMS2 A                                                                                                                | CACCACTATTGCTCATTGTACTG                                            |
| MMS2 B                                                                                                                | TAATATCGTCGCTATCAGCTAAACC                                          |
| MMS2 C                                                                                                                | AAGATAAATCTACCATGCGTCAATC                                          |
| MMS2 D                                                                                                                | TATTTATTATTGGCTTGGACTGGAG                                          |
| POL32 A                                                                                                               | AATTCTCGATCAGTATGCCTCAATA                                          |
| POL32 B                                                                                                               | TTTGTCTAGAGGTTTCTTGTCTATC                                          |
| <i>Saccharomyces cerevisiae</i> Genome Deletion Project                                                               |                                                                    |
| <b>Primers used for confirmation of <i>PSF1</i> or <i>psf1-1</i> presence</b>                                         |                                                                    |
| InProm                                                                                                                | AGCTAGGTTCCAAGAAGGCT                                               |
| dwPSF1                                                                                                                | CCAGCTTGAAAGCATCGATA                                               |
| <b>Primers used for verification of integration plasmids carrying trinucleotide tracts into the <i>Lys2</i> locus</b> |                                                                    |
| Lys2A                                                                                                                 | TGTGCCTTTGTTACGTCTATATTCA                                          |
| Lys2D                                                                                                                 | GAAGCTTCGCAAGTATTCATTTAG                                           |
| TRP1A                                                                                                                 | AGAGACCAATCAGTAAAAATC                                              |
| TRP1D                                                                                                                 | GCGAAAAGACGATAAATACAA                                              |
| URA3UP                                                                                                                | GGAGCACAGACTTAGATTGG                                               |
| URA3LW                                                                                                                | CGAGATTCCCGGTAATAAC                                                |

---

**Primers used for measurement of the stability of the trinucleotide tract**

---

|        |                          |
|--------|--------------------------|
| OBL157 | AGCAACAGGACTAGGATGAGTAGC |
| Tri1S  | ACTTGGGGAGAGGTGCG        |
| Tri1S2 | TGCTTTGCCGATGTTACTTGGG   |
| TNRUP1 | CGGCTTTCAAGACACCCATC     |
| TNRUP2 | TGTAACGTTACACCCTCTACC    |
| TNRUP3 | GCCCTTGCATGACAATTCTG     |
| TNRUP4 | GGGACCTAATGCTTCAAC       |

---

**Primers used for measurement of the stability of repetitive sequences located on plasmids**

---

|            |                           |
|------------|---------------------------|
| GT_FOR     | GTGGTTAGCAATCGCCTTAC      |
| GT_REV     | GTTTTCCAGTCACGAC          |
| REP1_FAM   | 6-FAM-CACGACGTTGTAAAACGAC |
| REP2_ROX   | ROX-CACGACGTTGTAAAACGAC   |
| REP3_HEX   | HEX-CACGACGTTGTAAAACGAC   |
| REP4_TAMRA | TAMRA-CACGACGTTGTAAAACGAC |

---

**Primers used for construction of the *RFA1-YFP* fusion cassette**

---

|          |                                  |
|----------|----------------------------------|
| RFA7317F | CAATCGGCTGCTAGCTTAAC             |
| RFA6231R | ACGGTTCACAATCCCTACAG             |
| LEU2_F_H | ACCAAGCTTCGACCCTCGAGGAGAACTTCTAG |
| LEU2_R_H | GCAAAGCTTCGACTACGTCGTAAGGCCGTTTC |

---
