# Supplementary material for: Defects in the GINS complex increase the instability of repetitive sequences via a recombination-dependent mechanism
Source: PubMed Central journal article supplement (PMC6922473; doi:10.1371/journal.pgen.1008494), 2019-12-09
Supplement: pgen.1008494.s006.pdf [file pgen.1008494.s006.pdf]

**S5 Table. Random sequences used in control experiments.**

---

**Chromosomal TNR expansion assay**

CCCAGGTCGCCGTCGTCCCCGTACGCGACGAACGTCGGGGAGTCCGGGTCGCCGTCCTCCCCGTCGTCCGATTCCG

---

**Plasmid-based frame shift assay**

GTCGACATGCGCTGGCCGCTTGCGTTGCGTCGTTGCTCTTTCTCGAG

---
